# Supplementary material for: Inhibition of p90RSK activation sensitizes triple-negative breast cancer cells to cisplatin by inhibiting proliferation, migration and EMT
Source: PubMed Central journal article supplement — BMB Rep. 2019 Dec 31;52(12):706–11. doi: 10.5483/BMBRep.2019.52.12.234 (PMC6941763; doi:10.5483/bmbrep.2019.52.12.234), 2019-12-31
Supplement: bmb-52-706_Supple.pdf [file bmb-52-706_Supple.pdf]

**Inhibition of p90RSK activation sensitizes triple-negative breast cancer cells to cisplatin by inhibiting proliferation, migration and EMT**

Yujin Jin<sup>1</sup>, Diem Thi Ngoc Huynh<sup>1</sup>, Keon Wook Kang<sup>2</sup>, Chang-Seon Myung<sup>1</sup>, Kyung-Sun Heo<sup>1\*</sup>

<sup>1</sup>College of Pharmacy and Institute of Drug Research and Development, Chungnam National University, Daejeon, South Korea

<sup>2</sup>College of Pharmacy and Research Institute of Pharmaceutical Sciences, Seoul National University, Seoul, 08826, Republic of Korea

Running Title: p90RSK activation in TNBC to cisplatin resistance

Keywords: Cisplatin, Epithelial-mesenchymal transition, p90RSK, Cell proliferation, Breast cancer cells

**Corresponding Author's Information:**

Kyung-Sun Heo

Tel.: 82-42-821-5927

Fax: 82-42-821-8925

E-mail: kheo@cnu.ac.kr

## **Materials and methods**

### **Reagents and antibody**

Rabbit anti-phospho-p38 Thr180/Thr182, rabbit anti-p38, rabbit anti-phospho-Akt Ser473, rabbit anti-Akt, rabbit anti-phospho-NF- $\kappa$ B Ser536, rabbit anti-phospho-p90RSK Ser380, rabbit anti-phospho-ERK1/2, and rabbit anti-ERK1/2 antibodies were purchased from Cell Signaling Technology, Inc. (Danvers, MA, USA). Mouse anti-NF- $\kappa$ B, mouse anti-RSK1, and si-RSK1 were purchased from Santa Cruz Biotechnology (Paso Robles, CA, USA). Rabbit anti-MMP2, rabbit anti-MMP9 antibodies, Muse cell cycle kit (#MCH100106), Muse Ki67 proliferation assay (#MCH100114), and immobilon-P (#IPVH00010) were purchased from Merck millipore. (Burlington, Massachusetts, USA). 10X Phosphate buffered saline (PBS, #EBA-1105) and reverse transcription 5X master mix (#EBT-1511) were purchased from ELPIS-BIOTECH (Daejeon, South Korea). Tri-RNA reagent (#FATRR-001) was purchased from Favorgen (Pingtung, China). DDP (#C2210000), doxorubicin (#D1515), ammonium persulfate (#A3678), 2-mercaptoethanol (#M6250), and skim milk (#70166) were purchased from Sigma-Aldrich (St. Louis, MO, USA). Clarity western ECL substrate (#170-5061), iQ SYBR green supermix (#170-8882AP) were purchased for BIO-RAD (Hercules, CA, USA). EzReprobe (#WSE-7240), EzRIPA Lysis kit (#WSE-7240) were purchased for ATTO corporation (Tokyo, Japan). Dulbecco's modified Eagle's medium (DMEM, #11963-092), RPMI medium 1640 (61870-036), Fetal bovine serum (FBS, #26140-079), Penicillin streptomycin (P/S, #1570-063) and 0.25% Trypsin/EDTA (#25200-072) were purchased from Gibco (Waltham, MA, USA). 3-(4,5-dimethylthiazole-2-yl)-2, 5-diphenyltetrazolium bromide (MTT, #M6494), and Lipofectamine 3000 (#L3000-008) was purchased from Invitrogen (Waltham, MA, USA). EndoFectin™ Max transfection reagent (#EF014) was purchased from GeneCopoeia, Inc (Maryland, USA).

### **Cell culture and MTT assay**

Human mammary carcinoma cell lines MDA-MB-231 (HTB-26™) or MCF-7 (AHTB-22™) and BT549 (HTB-122™) were obtained from the American Type Culture Collection (Manassas, VA, USA). For the cell viability assay, cells were seeded in 96-well at a density of  $1 \times 10^4$  cells per well. After 24

h of stabilization, the cells were treated with various dose of Cis-DDP for 24 h and then cell viability was determined using the MTT assay (Sigma-Aldrich).

### **Flow cytometry analysis**

The Flow cytometry analysis was used to measure cell proliferation and cell cycle using a Muse cell cycle and Ki-67 proliferation kit (#MCH100106 and #MCH100114) according to the manufacture's protocol. Briefly, MDA-MB-231 cells were seeded in 6-well plate at a density of  $1 \times 10^6$  cells/well. For cell proliferation experiment, cells were harvested after 36 h treated with Cis-DDP and fixed for 15 min with a provided fix buffer. Then, cells were permeabilized for 15 min using a provided permeabilization buffer and incubated with an anti-IgG1-PE or an anti-Ki67-PE at room temperature (RT) for 30 min. For cell cycle analysis, cells were harvested after 24 h treated with Cis-DDP and fixed in methanol for 4 h at  $-20^{\circ}\text{C}$  and then incubated in complete media containing Muse cell cycle reagent. The Cell proliferation and the Cell cycle analyses were performed using a Muse cell analyzer (EMD Millipore) and data were analyzed using a MUSE 1.5 analysis program.

### **Cell transfection**

Plasmids including pcDNA and dominant negative (DN)-p90RSK were transfected with EndoFectin™ Max transfection reagent (#EF014, GeneCopoeia) according to the manufacture's protocol. Rat RSK1 (NM031107) was mutated to K94A/K447A to create a kinase dead protein (DN-p90RSK1) with the QuickChange II site-directed mutagenesis kit (#200521, Agilent) as described previously (1).

### **Luciferase reporter assay**

Cells were transiently co-transfected with pNF- $\kappa$ B-luc and p-TK-renilla reporter plasmid by the DEAE-dextran methods as described previously (2). After transfection, cells were treated with  $10 \mu\text{M}$  FMK for 1 h followed by treatment with  $20 \mu\text{g/ml}$  Cis-DDP for 12 h. NF- $\kappa$ B promoter luciferase activity was assayed using a dual-luciferase reporter assay system.

### **Real-Time Polymerase Chain Reaction assay**

The quantitative RT-PCR (qRT-PCR) assay was used to analyze the mRNA expression of RSK1, RSK2,

MMP2, MMP9, E-cadherin, N-cadherin, vimentin, Snail, Twist, and ZEB1 as described previously (1). The relative gene expression was calculated using the  $2^{-\Delta\text{ct}}$  method, and GAPDH was used for normalization. All primer sequences used in qRT-PCR experiments are listed in Supplementary Table 1.

**Supplementary Table 1 – Primer sequence of genes**

| Genes      | Forward primer sequence | Reverse primer sequence   |
|------------|-------------------------|---------------------------|
| RSK1       | TGAAGGTGCTGAAGAAGGCA    | CAGCTTCACCACGAATGGGT      |
| RSK2       | AACCTATGGGAGAGGAGGAGA   | AGGATCTGCCTTTTCATGTCC     |
| Snail      | CCCCAATCGGAAGCCTACT     | GCTGGAAGGTAAACTCTGGATTAGA |
| Twist      | GGAGTCCGCAGTCTTACGAG    | TCTGGAGGACCTGGTAGAGG      |
| ZEB1       | GCACCTGAAGAGGACCAGAG    | TGCATCTGGTGTTCCATTTT      |
| MMP2       | ACAAAGAGTTGGCAGTGCAATA  | TCTGGTCAAGATCACCTGTCTG    |
| MMP9       | CAGTCCACCCTTGTGCTCTT    | CCAGAGATTTGACTCTCCAC      |
| E-Cadherin | AATTCCTGCCATTCTGGGGA    | TCTTCTCCGCTCCTTCTTC       |
| N-cadherin | TGAGCCTGAAGCCAACCTTA    | AGGTCCCCTGGAGTTTTCTG      |
| Vimentin   | AGCTAACCAACGACAAAGCC    | TCCACTTTGCGTTCAAGGTC      |
| GAPDH      | GCACCGTCAAGGGCTGAGAAC   | TGGTGAAGACGCCAGTGGA       |

### **p90RSK knockdown**

To knockdown p90RSK *in vitro*, specific short interference RNA (siRNA) was used (#SC-29475, Santa Cruz Biotechnology). A siRNA that does not match any known human coding cDNA was used as a negative control for silencing (Scramble, sc-37007, Santa Cruz Biotechnology). Transfections were performed using Lipofectamine 3000 (Invitrogen) according to the manufacturer's instructions.

### **Western blot analysis**

Western blotting analysis were performed as described previously (2). Briefly, total protein samples were separated by SDS-PAGE and transferred to nitrocellulose membranes. Western blotting was performed using an each corresponding specific antibody. Polyclonal mouse anti- $\alpha$ -tubulin (Sigma-Aldrich) was used as an internal control.

### ***In vitro* wound-healing assay**

MDA-MB-231 cells were seeded in 6-well plate at a density of  $1 \times 10^6$  cells/well. After 24 h, the

monolayers were scratched with a 200  $\mu$ l pipette tip for creating a wound area and washed twice with serum-free media. Cells were treated with FMK or transfected with DN-RSK1 followed by treatment with Cis-DDP for 36 h. The rate of wound closure was assessed and imaged. Each image is derived from the five randomly selected fields.

### **Immunofluorescent staining**

Immunofluorescence assay was performed as described previously (1). Briefly, cells were fixed with 4% paraformaldehyde for 15 min at RT and permeabilized with 0.1% Triton X-100 for 20 min. Cells were incubated with the primary antibodies (p65 1:100) overnight at 4°C followed by incubation with anti-rabbit secondary antibodies (Invitrogen) conjugated with Alexa 488 at a dilution of 1:400 at RT for 1 h. Cell nuclei were counterstained with 40, 6-diamidino-2-phenylindol (DAPI) for 5 min. Slides were mounted with prolong gold antifade mount reagent (#P36930, Invitrogen) and examined with a laser scanning confocal spectral microscope (Nanoscope systems, South Korea). Representative images were automatically taken using a SPOT digital camera.

### **Statistical analysis**

Statistical analysis was performed using GraphPad Prism 5 (version 5.02, GraphPad Software Inc., San Diego, CA, USA). One-way analysis of variance (ANOVA) followed by a Bonferroni multiple comparison was performed. A *p* value <0.05 was considered significant. All experiments were expressed as the mean  $\pm$ SEM and were performed independently at least 3 times.

## Supplementary Figures and Figure legends

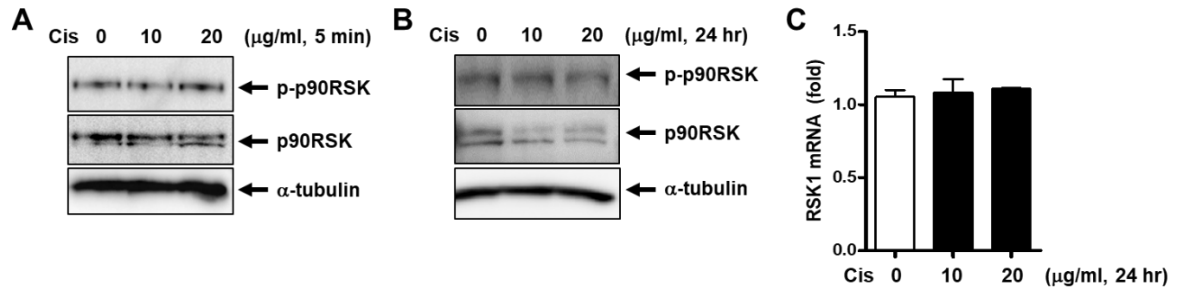

**Figure S1**

### **Figure S1. Phosphorylation and protein expression of p90RSK in Cis-DDP-treated MCF-7 cells.**

(A-B) MCF-7 cell were stimulated with 0, 10, 20  $\mu\text{g/ml}$  of Cis-DDP for 5 min (A) and 24 h (B) and phosphorylation and protein expression of p90RSK were determined by western blotting against indicated antibodies. (C) Messenger RNA level of p90RSK was determined by qPCR against RSK1 primer.

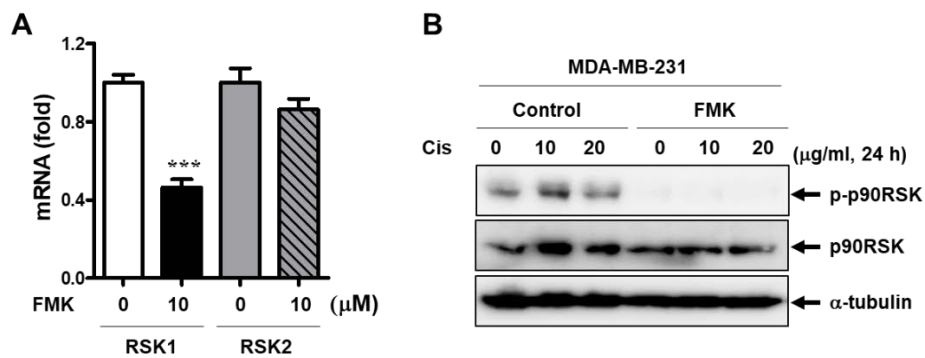

**Figure S2**

**Figure S2. Role of FMK on RSK1 activation and protein expression in MDA-MB-231 cells.** (A) MDA-MB-231 cells were treated with 10 μM of FMK for 24 h and total RNAs were subjected to qPCR analysis against RSK1 or RSK2 primers. (B) MDA-MB-231 cells were pretreated with 10 μM FMK for 1 h followed by treatment with 0, 10, 20 μg/ml of Cis-DDP for 24 h. Total protein lysates were subjected by western blotting using anti-phospho or –total p90RSK antibody.

## References

1. Heo KS, Chang E, Takei Y, Le NT, Woo CH, Sullivan MA, Morrell C, Fujiwara K, Abe J (2013) Phosphorylation of protein inhibitor of activated STAT1 (PIAS1) by MAPK-activated protein kinase-2 inhibits endothelial inflammation via increasing both PIAS1 transrepression and SUMO E3 ligase activity. *Arterioscler Thromb Vasc Biol* 33, 321-329
2. Heo KS, Le NT, Cushman HJ, Giancursio CJ, Chang E, Woo CH, Sullivan MA, Taunton J, Yeh ET, Fujiwara K, Abe J (2015) Disturbed flow-activated p90RSK kinase accelerates atherosclerosis by inhibiting SENP2 function. *J Clin Invest* 125, 1299-1310
